# Supplementary material
Source: PubMed Central journal article supplement (PMC7342494)
Supplement: NIHMS1604577-supplement-Supplementary_Material.pdf [file NIHMS1604577-supplement-Supplementary_Material.pdf]

PeIA-5466: A novel peptide antagonist containing non-natural amino acids that selectively targets  $\alpha 3\beta 2$  nicotinic acetylcholine receptors

Arik J. Hone, Fernando Fisher, Sean Christensen, Joanna Gajewiak, David Larkin, Paul Whiteaker, J. Michael McIntosh

Table of Contents

Supporting Information

Figure 1. Synthesis and folding of PeIA-5466

Figure 2. RP-HPLC analysis of peptide purity

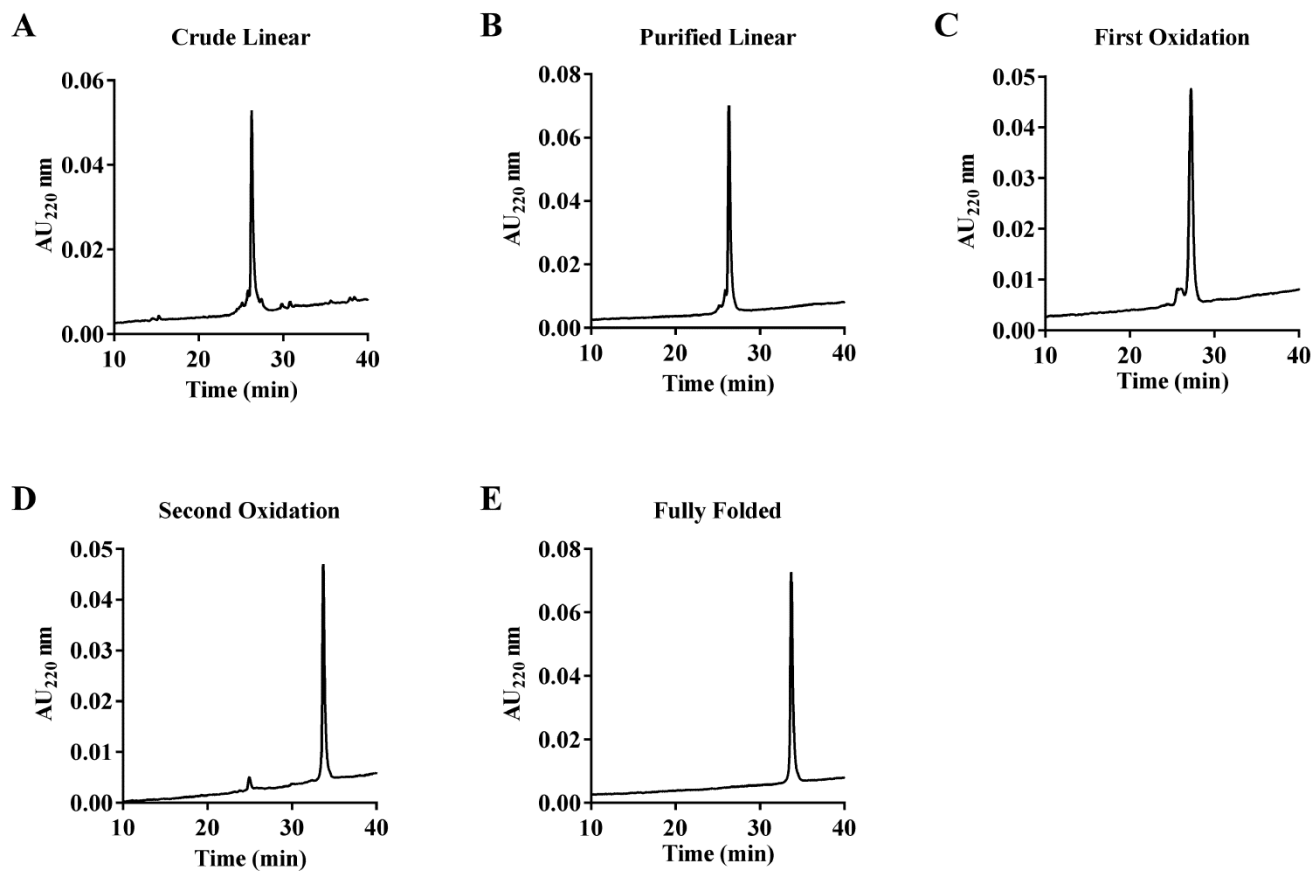

Figure 1. RP-HPLC chromatograms illustrating the synthesis, folding, and purity analysis of PeIA-5466. (A) crude linear peptide, (B) purified linear peptide, (C) first-step oxidative folding leading to the first disulfide bond (Cys<sup>2</sup>-Cys<sup>8</sup>) formation, (D) second-step oxidative folding leading to the second disulfide bond (Cys<sup>3</sup>-Cys<sup>16</sup>) formation, (E) purity analysis of the fully folded peptide. The solvent gradient used in all steps was 10% to 50% B60 in 40 min on analytical C18-column (Vydac, 5  $\mu$ M, 250x4.6 mm) (solvent A: 0.1% TFA in water; solvent B: 60% acetonitrile (ACN) 0.092% TFA, 40% water).

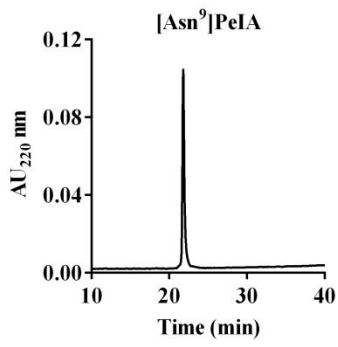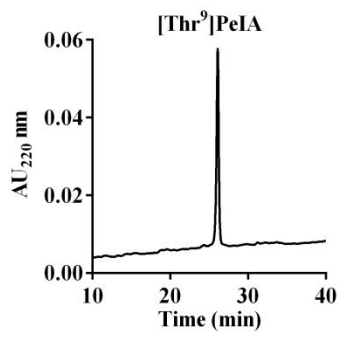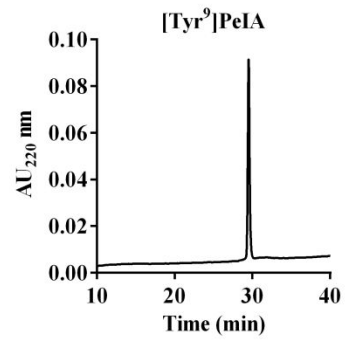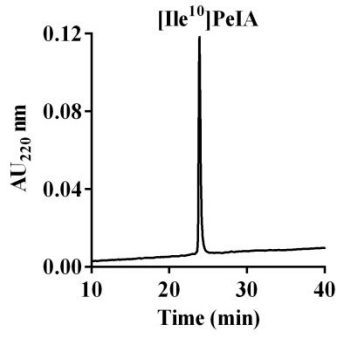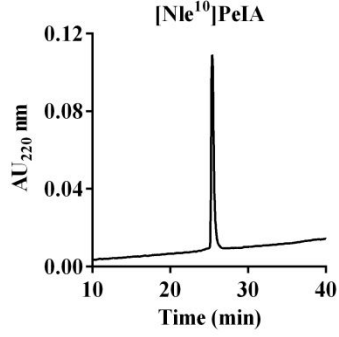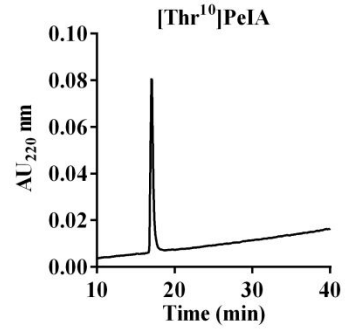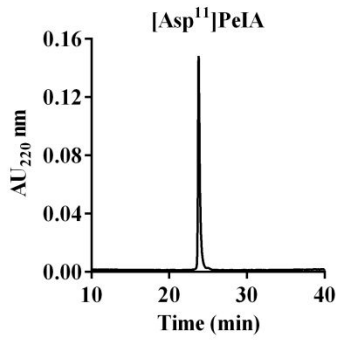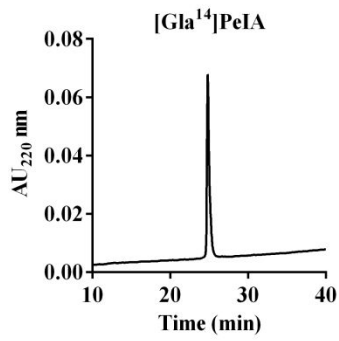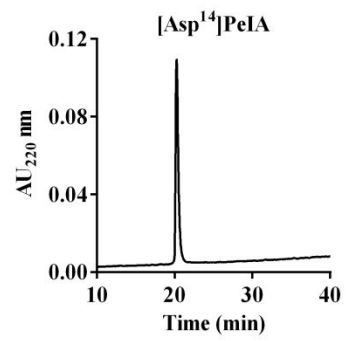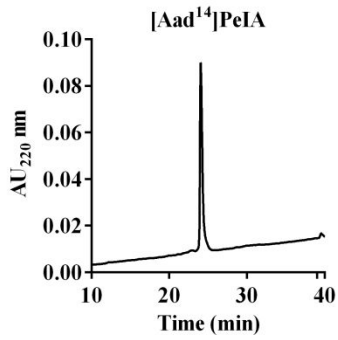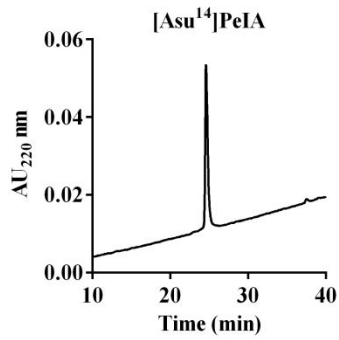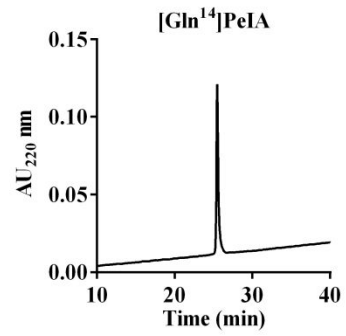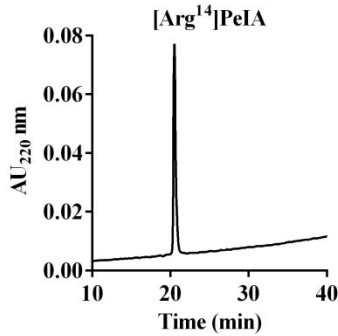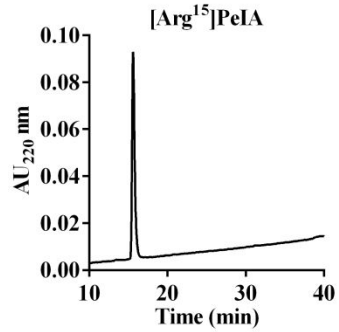

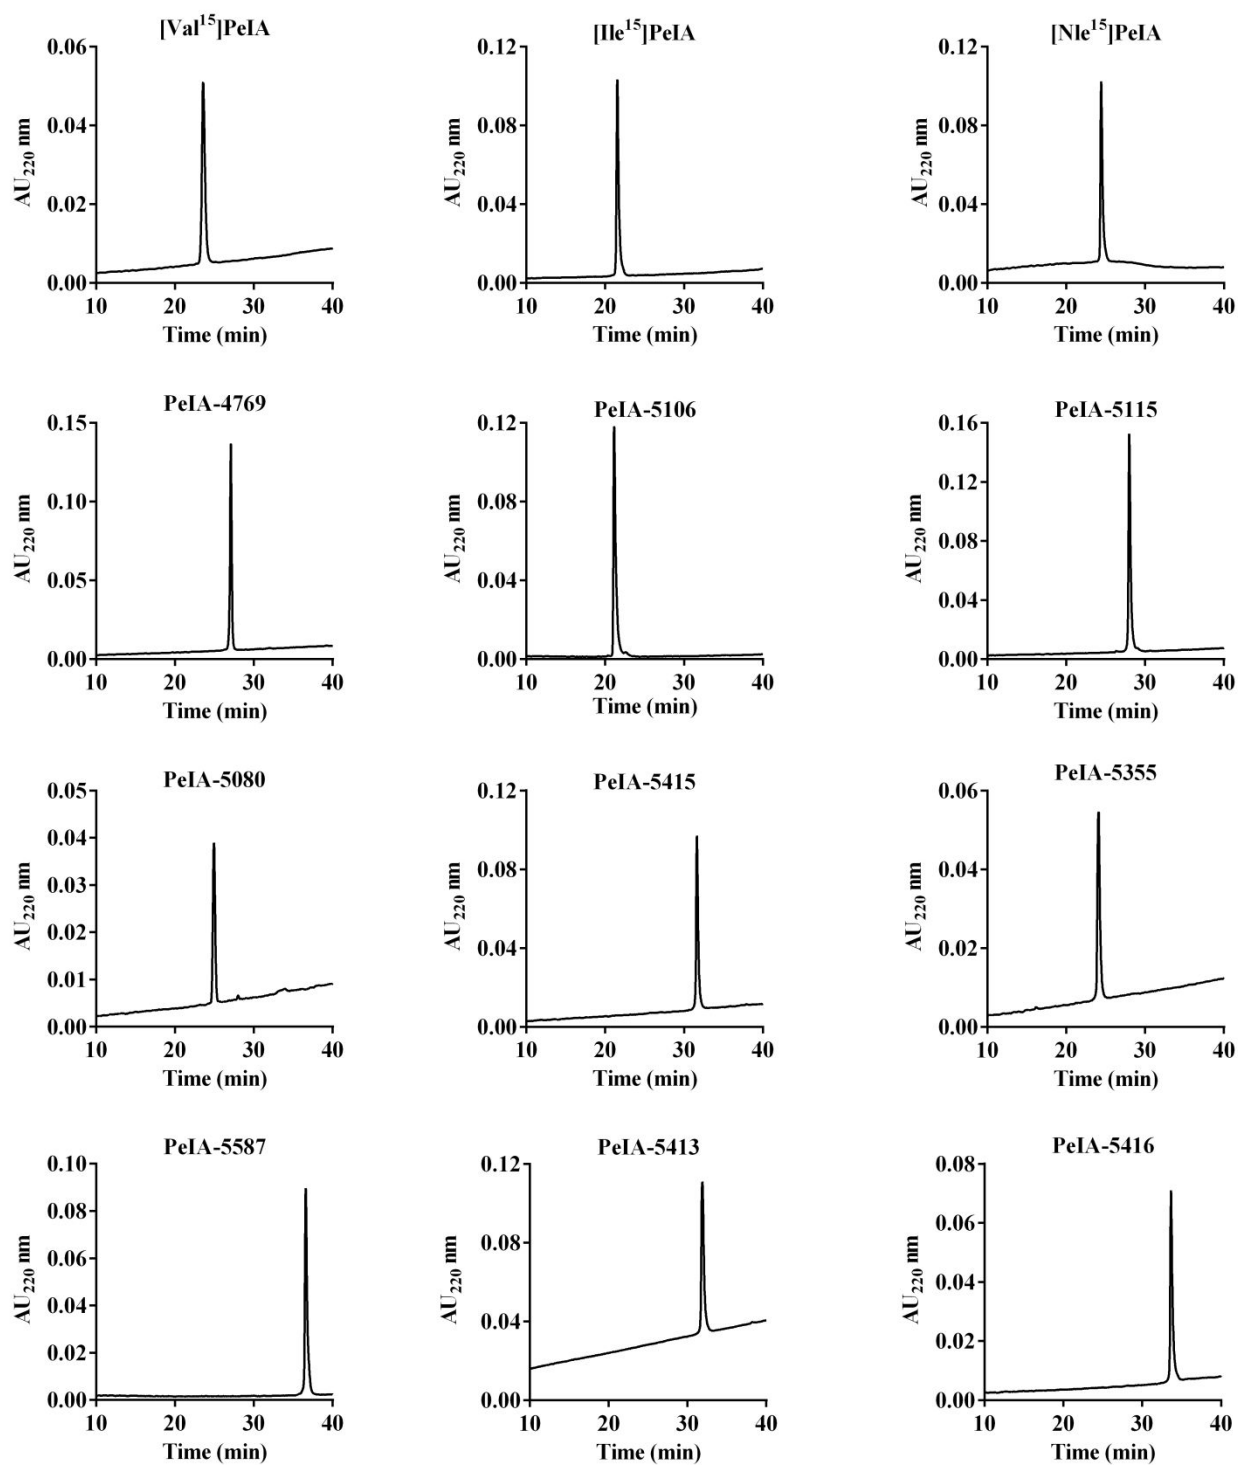

Figure 2. RP-HPLC chromatograms showing the purity of all fully folded peptides. The solvent gradient for all peptides was 10% to 50% B60 in 40 min on analytical C18-column (Vydac, 5  $\mu$ M, 250x4.6 mm) (solvent A: 0.1% TFA in water; solvent B: 60% acetonitrile (ACN) 0.092% TFA, 40% water). Purity percentages are provided in Table 2.
